# Supplementary material for: From Epidemiology of Community-Onset Bloodstream Infections to the Development of Empirical Antimicrobial Treatment-Decision Algorithm in a Region with High Burden of Antimicrobial Resistance
Source: MDPI journal article supplement (doi:10.3390/antibiotics12121699), 2023-12-05
Supplement: s1 [file s1]

## Supplementary Materials

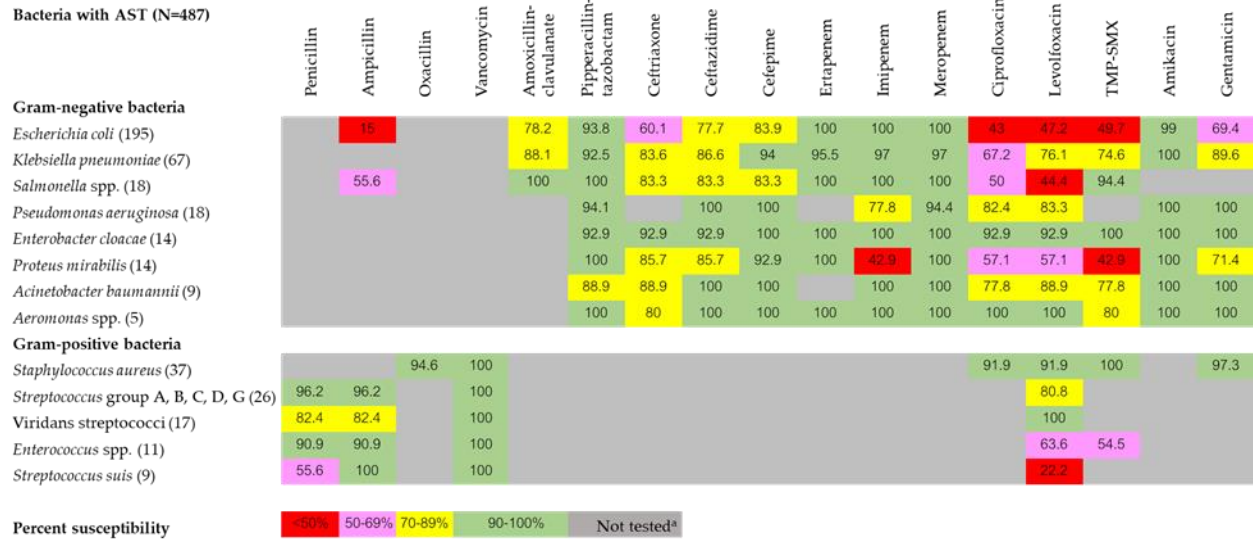

**Figure S1.** Antimicrobial susceptible percentage of clinical isolated bacteria with  $\geq 5$  first isolate counts. Abbreviations: AST, antimicrobial susceptibility testing; TMP-SMX, trimethoprim-sulfamethoxazole.

**Table S1.** Categories of appropriate and inappropriate antimicrobial use.

| Term                                        | Definition                                                                                                                                          |
|---------------------------------------------|-----------------------------------------------------------------------------------------------------------------------------------------------------|
| Optimally active coverage (appropriate)     | Empirical active antimicrobial treatment based on local antimicrobial guidelines                                                                    |
| Broad spectrum active coverage              | Empirical active antimicrobial treatment has broader spectrum than in the local antimicrobial guidelines                                            |
| Inactive spectrum coverage                  | Empirical inactive antimicrobial treatment according to susceptibility test report                                                                  |
| Narrower/simpler antimicrobial is available | Available active narrower spectrum coverage or once daily dosing antimicrobials                                                                     |
| Multiple antimicrobials change in 48h       | >1 antimicrobial change in 48h, while awaiting for susceptibility test report                                                                       |
| Unnecessary double coverage                 | Combination treatment to cover anaerobes or MRSA in skin and soft tissue infection and biliary tract infection                                      |
| Shorter duration is possible                | Antimicrobials can be stopped in 6-10 days in hemodynamically stable and afebrile patients $\geq 48$ h                                              |
| Oral step-down treatment is possible        | Available active oral antimicrobials in patients with appropriate source control measures, and appropriate clinical response by day 5 of bacteremia |

Abbreviations: MRSA, methicillin-resistant *Staphylococcus aureus*.
